# Supplementary material
Source: Springer Nature journal article supplement (https://www.springermedizin.de/resource/supplementary/12879_2013_3094_MOESM1_ESM.pdf/9446008)
Supplement: MOESM1 [file 9446008]

## Institutional Review Boards/Ethics Committees by Country – Study 0015

| Country   | Institutional Review Board/Ethics Committee                                                                                                                                                                                                                                                                                                                                                                                                                                                                                                                                                                                                                                                                                                                                                                                                                                                                                                                                                                                                                                                                                                                                                                                                                                                                                                                                                                                                                                                                                                                                                |
|-----------|--------------------------------------------------------------------------------------------------------------------------------------------------------------------------------------------------------------------------------------------------------------------------------------------------------------------------------------------------------------------------------------------------------------------------------------------------------------------------------------------------------------------------------------------------------------------------------------------------------------------------------------------------------------------------------------------------------------------------------------------------------------------------------------------------------------------------------------------------------------------------------------------------------------------------------------------------------------------------------------------------------------------------------------------------------------------------------------------------------------------------------------------------------------------------------------------------------------------------------------------------------------------------------------------------------------------------------------------------------------------------------------------------------------------------------------------------------------------------------------------------------------------------------------------------------------------------------------------|
| Argentina | <p>Comite de Etica en Investigacion Clinica, “Dr. Virgilio Foglia”, Tucuman 335-7° “D” (C1049AAG), Buenos Aires</p> <p>Comite De Docencia e Investigacion Sanatorio Parque SA, Bv. Orono 860, Rosario (2000), Santa Fe</p> <p>Departamento de Docencia e Investigacion, Comité de Revision Institucional, Sanatorio Mitre, Bartolome Mitre 2553, (C1039AAO) Ciudad de Buenos Aires</p> <p>Instituto de Investigaciones Medicas, Dr. Alfredo Lanari, Combatientes de Malvinas 3150 (C1427ARN), Ciudad de Buenos Aires</p> <p>Comite de Etica e Investigaciones Biomedica, Sanatorio Otamendi y Miroli S.A., Azcuenaga 870, (C1029AAP) Ciudad de Bueno Aires</p> <p>Comite de Docencia e Investigacion, Hospital Nacional Alejandro Posadas, Marconi e Illia, (1684) Haedo, Moron, Buenes Aires</p> <p>Comite de Etica e Investigación, Secretaria de Salud Publica de la Municipalidad de Rosario, Rueda 1100, (S2000OHV) Rosario, Sante Fe</p> <p>Comite de Etica Medica del Hospital Frances, La Rioja 951, (C1221ACI) Ciudad de Buenos Aires</p> <p>Comité de Docencia e Investigación del Hospital Frances, La Rioja 951 (C1221ACI) Ciudad de Buenos Aires</p> <p>Comite de Docencia e Investigacion Hospital Escuela Eva Peron, Av. San Martin 1645, 2152 - Granadero Baigorria, Pcia Santa Fe</p> <p>Comite de Etica en Investigación, CEMIC – Centro de Educacion Medica e Investigaciones Clinicas, Galvan 4102, (C1431FWN) Ciudad de Buenos Aires</p> <p>Comite de Docencia e Investigacion, Clinica de Los Virreyes, Ciudad de La Paz 1157, (C1426AGU) Ciudad de Buenos Aires</p> |
| Australia | <p>Uniting HealthCare, Human Research Ethics Committee, The Wesley Hospital, Moorlands House, 451 Coronation Drive, Auchenflower QLD 4066</p> <p>South Eastern Sydney Area Health Service, Human Research Ethics Committee – Eastern Section, Room G71, EBB, Cnr High &amp; Avoca Streets, Randwick, NSW</p> <p>Royal Brisbane &amp; Women’s Hospital, Health Service District, Human</p>                                                                                                                                                                                                                                                                                                                                                                                                                                                                                                                                                                                                                                                                                                                                                                                                                                                                                                                                                                                                                                                                                                                                                                                                  |

| Country | Institutional Review Board/Ethics Committee                                                                                                                                                                                                                                                                                                                                                                                                                                                                                                                                                                                                                                                                                                                                                                                                                                                                                                                                      |
|---------|----------------------------------------------------------------------------------------------------------------------------------------------------------------------------------------------------------------------------------------------------------------------------------------------------------------------------------------------------------------------------------------------------------------------------------------------------------------------------------------------------------------------------------------------------------------------------------------------------------------------------------------------------------------------------------------------------------------------------------------------------------------------------------------------------------------------------------------------------------------------------------------------------------------------------------------------------------------------------------|
|         | <p>Research Ethics Committee, Room 6, G Floor Clinical Sciences Bldg., Herston Road, Herston, QLD</p> <p>University of Wollongong / Illawarra Area Health Service, Human Research Ethics Committee, Northfields Ave, Wollongong, NSW</p> <p>Royal Brisbane &amp; Women's Hospital, Health Service District, Human Research Ethics Committee, Room 6, G Floor Clinical Sciences Building, Herston Road, Herston, QLD</p>                                                                                                                                                                                                                                                                                                                                                                                                                                                                                                                                                          |
| Belgium | <p>Comite d'Ethique, Universite Libre de Bruxelles Hopital Erasme, Route de Lennik 808, B-1070 Bruxelles</p> <p>Ethisch Comite, Algemeen Stedelijk Ziekenhuis, Merestraat 80, B-9300 AALST</p> <p>Comité d'éthique Medicale, CHR St. Joseph Mons, Warquignies, Avenue Baudouin de Constantinople 5, 7000 Mons</p> <p>Ethisch Comité of AZ Damián, Campus Heilig Hart, Gouwelozestraat 100, 8400 Oostende</p> <p>Ethisch Comité OLV Ter Linden, Graaf Jansdijk 162, 8300 Knokke-Heist</p> <p>Comité d'éthique CH Notre Dame et Reine Fabiola, Grand Rue 3, 6000 Charleroi</p>                                                                                                                                                                                                                                                                                                                                                                                                     |
| Brazil  | <p>Irmandade da Santa Casa de Misericordia de Sao Paulo, Comite de Etica em Pesquisa em Seres Humanos, Rua Dr. Cesario Mota Junior, 112, Santa Cecilia, Sao Paulo</p> <p>Comite de Etica em Pesquisa da Faculdade de Medicina de Sao Jose do Rio Preto, Av. Brigadeiro Faria Lima, 5416, Sao Jose do Rio Preto</p> <p>Complexo Hospitalar Heliopolis - Comite de Etica em Pesquisa, Rua Conego Xavier, 276, Secoma – Sao Paulo - 10° andar</p> <p>Universidade Federal de Santa Catarina, Comite de Etica em Pesquisa com Seres Humanos, Campus Universitario – Trindade – 88040-900, Florianópolis, Santa Catarina</p> <p>Faculdade de Ciencias Medicas, Comite de Etica em Pesquisa, Caixa Postal 6111, 13083-970</p> <p>Comite de Etica em Pesquisa do Hospital Geral de Vila Penteado, Dr. Jose Pangella, Av. Ministro Petronio Portela, 1642, Freguesia do O, Sao Paulo</p> <p>Comite de Etica em Pesquisa do Hospital Mae de Deus, Rua Jose Alencar, 286, Porto Alegre</p> |

| Country | Institutional Review Board/Ethics Committee                                                                                                                                                                                                                                                                                                                                                                                                                                                                                                                                                                                                                                                                                                                                                                                                |
|---------|--------------------------------------------------------------------------------------------------------------------------------------------------------------------------------------------------------------------------------------------------------------------------------------------------------------------------------------------------------------------------------------------------------------------------------------------------------------------------------------------------------------------------------------------------------------------------------------------------------------------------------------------------------------------------------------------------------------------------------------------------------------------------------------------------------------------------------------------|
| Canada  | <p>Humber River Regional Hospital, Research Ethics Board, 200 Church Street, Toronto, Ontario</p> <p>Windsor Regional Hospital Research Ethics Board, 1995 Lens Avenue, Windsor, Ontario</p> <p>Comite d’Ethique de la Recherche de L’Hopital Laval, Hopital Laval, 2725 Chemin Ste-Foy, Ste-Foy, Quebec</p> <p>Rouge Valley Health System Research Ethics Board, 2867 Ellesmere Road, Toronto, Ontario</p> <p>Investigational Review Board, St. John Regional Hospital 5DN, 400 University Ave St. John, New Brunswick</p> <p>CSSS de Saint-Jerome, Comite d’ethique de la recherché de l’Hotel-Dieu de Saint-Jerome, 290 rue Montigny, St-Jerome, Quebec</p> <p>St. Joseph’s Healthcare REB, 50 Charlton Avenue East, Room H308, Hamilton, Ontario</p> <p>Biomedical Ethics Review Board, P126-770 Bannatyne Ave, Winnipeg, Manitoba</p> |
| Chile   | <p>Comité de Evaluacion Etico Cientifico – Servicio de Salud Metropolitano Sur Gran Avenida Jose Miguel Carrera 3204, Santiago</p> <p>Comite Etico-Cientifico del Servicio de Salud Metropolitano Central, Santa Rosa 1234, Santiago de Chile</p> <p>Comite de Etica, Direccion de Investigacion Escuela de Medicina, Pontifica Universidad Catolica de Chile, Marcoleta 391, Santiago</p> <p>Secretaria Regional Ministerial de Salud, Comite Etico Cientifico Clinico – Octava Region, Caupolican 518 Office N° 510, Concepcion</p> <p>Comite de Evaluacion Etico-Cientifico – Servicio de Salud Metropolitano Sur Oriente, Hospital “Dr. Sotero del Rio”, Av. Concha y Toro 3459, Paradero 30 Vic. Mackenna, Puente Alto</p>                                                                                                            |

| Country        | Institutional Review Board/Ethics Committee                                                                                                                                                                                                                                                                                                                                                                                                                                                                                                                                                                                                                                                                                                                                                                                                                                                                          |
|----------------|----------------------------------------------------------------------------------------------------------------------------------------------------------------------------------------------------------------------------------------------------------------------------------------------------------------------------------------------------------------------------------------------------------------------------------------------------------------------------------------------------------------------------------------------------------------------------------------------------------------------------------------------------------------------------------------------------------------------------------------------------------------------------------------------------------------------------------------------------------------------------------------------------------------------|
| Croatia        | <p>Local Ethics Committee of University Clinic for Infectious Diseases “Dr. Fran Mihaljevic”, Mirogojska 810000, Zagreb</p> <p>Drug Committee of University Clinic for Infectious Diseases “Dr. Fran Mihaljevic”, Mirogojska 810000, Zagreb</p> <p>Central Ethics Committee of Republic of Croatia, Ksaver 200a, 10000 Zagreb</p> <p>Ministry of Health and Social Welfare of Republic of Croatia, Ksaver 200a, 10000 Zagreb</p> <p>Drug Committee of Clinical Hospital Dubrava, Avenija Gojka Suska 6, 10000 Zagreb</p> <p>Local Ethics Committee of Clinical Hospital Split, Spinciceva 1, 21000 Split</p> <p>Drug Committee of Clinical Hospital Split, Spinciceva 1, 21000 Split</p> <p>Local Ethics Committee of General Hospital “Dr. Josip Bencevic”, Andrije Stampara 42, 35000 Slavonski Brod</p> <p>Drug Committee of General Hospital “Dr. Josip Bencevic”, Andrije Stampara 42, 35000 Slavonski Brod</p> |
| Czech Republic | <p>Multicentric Ethics Committee at the Teaching Hospital Praha Motol, V uvalu 84, 150 06 Praha 5</p> <p>Ethics Committee at the Regional Hospital, Breclav, U nemocnice 1, 690 47 Breclav</p> <p>Ethics Committee at the Teaching Hospital Vinohrady, Srobarova 50, 100 34 Praha 10</p> <p>Ethics Committee at the Teaching Hospital Bulovka, Budinova 2, 180 81 Praha 8</p>                                                                                                                                                                                                                                                                                                                                                                                                                                                                                                                                        |
| France         | CCPPRB – Paris Broussais HEGP, 96, rue Didot, 75014 Paris                                                                                                                                                                                                                                                                                                                                                                                                                                                                                                                                                                                                                                                                                                                                                                                                                                                            |
| Germany        | <p>Landesamt für Gesundheit und Soziales, Geschäftsstelle der Ethikkommission des Landes Berlin, Sachsische Str. 28, D-10707 Berlin</p> <p>Ethikkommission der Medizinischen Fakultät der Westfälischen Wilhelms-Universität Münster und der Ärztekammer Westfalen-Lippe, Von-Esmarch-Str. 62, D-48149 Münster</p> <p>Ehtik-Kommission der Medizinische Hochschule Hannover, Carl-Neuberg-Str. 1, D-30625 Hannover</p>                                                                                                                                                                                                                                                                                                                                                                                                                                                                                               |

| Country | Institutional Review Board/Ethics Committee                                                                                                                                                                                                                                                                                                                                                                                                                                                                                                                                                                                                                                                                                                                                                                                                                                                                                                                                                                                                                                                                                                                                                                                                                            |
|---------|------------------------------------------------------------------------------------------------------------------------------------------------------------------------------------------------------------------------------------------------------------------------------------------------------------------------------------------------------------------------------------------------------------------------------------------------------------------------------------------------------------------------------------------------------------------------------------------------------------------------------------------------------------------------------------------------------------------------------------------------------------------------------------------------------------------------------------------------------------------------------------------------------------------------------------------------------------------------------------------------------------------------------------------------------------------------------------------------------------------------------------------------------------------------------------------------------------------------------------------------------------------------|
| Greece  | <p>Scientific Council, General Hospital of Chest Diseases "Sotiria", 152 Mesogion Avenue, Athens</p> <p>Scientific Council, General Hospital of Larissa 1 Tsakalof Street, Larhsa 41221</p> <p>Scientific Council, Sismanoglio General Hospital, 1 ~ismanoglio Street, Maroussi</p> <p>Scientific Council, "Evangelismos" General Hospital of Athens, 45-47 Ipsilantou Street, Athens</p> <p>Scientific Council of General Hospital of Athens "George Gennimatas", 154 Mesogeion Avenue, Athens</p> <p>Scientific Council, AHEPA University Hospital, 1 Kiriakidi Street, Thessaloniki</p>                                                                                                                                                                                                                                                                                                                                                                                                                                                                                                                                                                                                                                                                             |
| India   | <p>Human Research Ethics Committee, Shri M.P. Shah Medical College, Jamnagar – 361001, Gujarat</p> <p>Ethics Committee of KMC Hospital, N.G. Road, Attavar, Mangalore 575001</p> <p>Institutional Review Board, Bhopal Memorial Hospital &amp; Research Centre, Bhopal 462 038</p> <p>Institutional Ethics Committee, Calicut Medical College, Calicut-673008, Kerala</p> <p>Metro Ethics Review Board for Research on Human Subjects, Metro Hospital &amp; Heart Institute, Noida, Delhi-201301</p> <p>Poona Medical Research Foundation, 40 Sassoon Road, Pune 411001</p> <p>Ethics Committee of M.G.M. Medical College and M.Y. Hospital, Indore-452018</p> <p>Office of the Ethics Committee, Department of Medicine, Indira Gandhi Government Medical College, C. A. Road, Nagpur-440018, Maharashtra</p> <p>Ethics Committee, Sardar Patel Medical College &amp; Associate Group of Hospitals, Bikaner – 334 003, Rajasthan</p> <p>Ethics Committee, Kamineni Hospital, L.B. Nagar, Hyderabad – 500 068</p> <p>S.R. Kalla Memorial Ethical Committee for Human Research, 78, Dhuleshwar Garden, Behind HSBC Bank, Sardar Patel Marg, C – Scheme, Jaipur, 302001, Rajasthan</p> <p>Monilek Hospital &amp; Research Centre (A wing of Smt. Mohini Devi Lekhraj</p> |

| Country | Institutional Review Board/Ethics Committee                                                                                                                                                                                                                                                                                                                                                                                                                                                                                                                                                                                                                                                                                                                                                                                                                                                                                                                                                                                                                                                                                             |
|---------|-----------------------------------------------------------------------------------------------------------------------------------------------------------------------------------------------------------------------------------------------------------------------------------------------------------------------------------------------------------------------------------------------------------------------------------------------------------------------------------------------------------------------------------------------------------------------------------------------------------------------------------------------------------------------------------------------------------------------------------------------------------------------------------------------------------------------------------------------------------------------------------------------------------------------------------------------------------------------------------------------------------------------------------------------------------------------------------------------------------------------------------------|
|         | Odhrani Charitable Trust), Sector-4 Jawahar Nagar, Jaipur 302 004                                                                                                                                                                                                                                                                                                                                                                                                                                                                                                                                                                                                                                                                                                                                                                                                                                                                                                                                                                                                                                                                       |
| Israel  | <p>Tel Aviv Sourasky Medical Center Helsinki Committee, Tel Aviv Sourasky Medical Center, Tel Aviv 64239</p> <p>HaEmek Medical Center Helsinki Committee, HaEmek Medical Center, Afula 18101</p> <p>Hillel Yaffe Medical Center Helsinki Committee, Hillel Yaffe Medical Center, Hadera 38100</p> <p>Rabin Medical Center Helsinki Committee, Rabin Medical Center, Belinson, Petah Tikva 49100</p> <p>Meir Medical Center Helsinki Committee, Meir Medical Center, Kfar Saba 44281</p> <p>Bnai-Zion Medical Center Helsinki Committee, Bnai-Zion Medical Center, Haifa 31048</p> <p>Soroka Helsinki Committee, Soroka University Medical Center, Beer Sheva 84101</p>                                                                                                                                                                                                                                                                                                                                                                                                                                                                  |
| Italy   | <p>Comitato Etico delle Aziende Sanitarie dell' Umbria, Centro Commerciale La Galleria, Piano 2, Int 37, Via Gramsci, 6, 06074 Ellera di Corciano – Perugia</p> <p>Comitato Etico dell'Azienda Ospedaliera "Ospedali Riuniti" di Foggia, Viale Pinto, 71100 Foggia</p> <p>Comitato Etico dell'Azienda Complesso Ospedaliero San Filippo Neri, Via Giovanni Martinotti, 20, 00135 Roma</p> <p>Comitato Etico, Azienda Ospedaliero, Universitaria Trieste</p> <p>Comitato Etico Locale per la Sperimentazione Clinica, dell"Ospedale Luigi Sacco, Via G.B. Grassi, 74, 20157 Milan</p> <p>Comitato Etico Indipendente Dell'Azienda Ospedaliera "Ospedale Fatebenefratelli E Oftalmico", Corso Di Porta Nuova, 23, 20121, Milano</p> <p>Comitato Di Bioetica Del Policlinico San Matteo, Viale Golgi, 19, 27100 Pavia</p> <p>Comitato ETIG, Azienda Ospedaligra Di Padova, c/o Servizio Di Farmacolgia Medica, Via Girusiniani, 1, 35128 Padova</p> <p>Comitato Etico dell'Azienda, "Ospedale Maggiore della Carita", Corso Mazzini, 18, 28100 Novara</p> <p>Comitato Ethics I.C.P., c/o Ospedale v. Buzzi, via Castelvetro, 32, 20154</p> |

| Country  | Institutional Review Board/Ethics Committee                                                                                                                                                                                                                                                                                                                                                                                                                                                                                                                                                                                                                                                         |
|----------|-----------------------------------------------------------------------------------------------------------------------------------------------------------------------------------------------------------------------------------------------------------------------------------------------------------------------------------------------------------------------------------------------------------------------------------------------------------------------------------------------------------------------------------------------------------------------------------------------------------------------------------------------------------------------------------------------------|
|          | <p>Milan</p> <p>Comitato Etico, Azienda Ospedaliera San Paolo – Polo Universitario<br/>Ufficio Segreteria – Il Piano Blocco C, Via A. Di Rudini, 8, 20141, Milano</p>                                                                                                                                                                                                                                                                                                                                                                                                                                                                                                                               |
| Malaysia | <p>Research Ethics Committee (Human), Universiti Sains Malaysia, Clinical Research Platform Office, School of Dentistry, Health Campus, 16150 Kubang Kerian Kelantan</p> <p>Medical Research and Ethics Committee, Faculty of Medicine, Universiti Kebangsaan Malaysia, Jalan Yacob Latif, Bandar Tun Razak, Cheras, 56000 Kuala Lumpur</p> <p>Institute of Medical Ethics Committee, Institute of Medical Research (IMR), Ministry of Health, Jalan Pahang, 50588 Kuala Lumpur</p> <p>Institute of Medical Research (IMR), Ministry of Health, Jalan Rumah Sakit Bangsar, 59000 Kuala Lumpur</p> <p>Urusetia NIH, Institut Pengurusan Kesihatan, Jalan Rumah Sakit Bangsar, 59000 Kuala Lumpur</p> |
| Malta    | <p>Health Ethics Committee, Castellania Palace, 15, Merchant’s Street, Valletta</p> <p>Medicines Authority, 198, Rue D’Argens, Gzira</p>                                                                                                                                                                                                                                                                                                                                                                                                                                                                                                                                                            |
| Peru     | <p>Comite Institucional de Etica, Universidad Peruana Cayetano Heredia, Av. Honorio Delgado 430, Lima</p> <p>Comite de Etica, Clinica San Pablo, Av. El Polo 789, El Derby, Monterrico, Lima</p> <p>Comite de Etica, Hospital Nacional Edgardo Rebagliati Martins, EsSalud, Av. Edgardo Rebagliati 490 – Jesus Maria, Lima</p> <p>Comite Institucional de Etica, Universidad Peruana Cayetano Heredia, Av. Honorio Delgado 430, Lima</p>                                                                                                                                                                                                                                                            |
| Poland   | <p>Komisja Bioetyczna przy, Centrum Medycznym Kształcenia Podyplomowego, ul. Mrymoncka 99/103, Warszawa</p> <p>Komisja Bioetyczna Okregowej Izby Lekarskiej w Lodzi, ul. Czerwona 3, 93-005 Lodz</p> <p>Komisja Bioetyczna przy Okregowej Izbie Lekarskiej, ul. Basniowa 3, Warszawska</p> <p>Komisja Bioetyczna przy Okregowej Izbie Lekarskiej w Gdansku, ul. Sniadeckich 33, 80-204 Gdansk</p>                                                                                                                                                                                                                                                                                                   |

| Country      | Institutional Review Board/Ethics Committee                                                                                                                                                                                                                                                                                                                                                                                                                                                                                                                                                                                                                                                                                                                                                                                                                                                                                                                                                                                                                                                                                                                                                                                      |
|--------------|----------------------------------------------------------------------------------------------------------------------------------------------------------------------------------------------------------------------------------------------------------------------------------------------------------------------------------------------------------------------------------------------------------------------------------------------------------------------------------------------------------------------------------------------------------------------------------------------------------------------------------------------------------------------------------------------------------------------------------------------------------------------------------------------------------------------------------------------------------------------------------------------------------------------------------------------------------------------------------------------------------------------------------------------------------------------------------------------------------------------------------------------------------------------------------------------------------------------------------|
| Singapore    | National Healthcare Group, NHG Domain Specific Review Board – Domain B, 6 Commonwealth Lane, Level 6 GMTI Building                                                                                                                                                                                                                                                                                                                                                                                                                                                                                                                                                                                                                                                                                                                                                                                                                                                                                                                                                                                                                                                                                                               |
| Slovakia     | Eticka Komisia, Fakultna NsP Trnava, A. Zarnova 11, 917 75 TRNAVA<br>Eticka Komisia, Fakultna NsP Bratislava, pracovisko Kramare, Limbova 5, 833 05 BRATISLAVA                                                                                                                                                                                                                                                                                                                                                                                                                                                                                                                                                                                                                                                                                                                                                                                                                                                                                                                                                                                                                                                                   |
| South Africa | South African Medical Association, Research Ethics Committee, Block F Castle Walk Corporate Park, Nossob Street, Erasmuskloof Ext 3, Pretoria 0153                                                                                                                                                                                                                                                                                                                                                                                                                                                                                                                                                                                                                                                                                                                                                                                                                                                                                                                                                                                                                                                                               |
| Taiwan       | <p>Joint Institutional Review Board, No. 201, Shih-Pai Road, Sec. 2, Taipei</p> <p>The Institutional Review Board, Tri-Service General Hospital, No. 325, Sec. 2, Cheng-Kung Rd. Neihu, Taipei</p> <p>Institutional Review Board, No. 110, Sec. 1, Chien-Kuo N. Road, Taichung</p> <p>Institutional Review Board, Taichung Veterans General Hospital, No. 160, Sec. 3 Chung Kang Road, Taichung</p> <p>The Institutional Review Board, Chi Mei Medical Center, 901 Chung Hwa Road, Yungkang City, Tainan county 710</p> <p>Research Ethics Committee, National Taiwan University Hospital, 7 Chung-Shan South Road, Taipei</p> <p>Joint Institutional Review Board, Taipei Veterans General Hospital, 201, Sec. 2, Shih-Pai Road, Taipei</p> <p>Institutional Review Board of Chang Gung Memorial Hospital, 199, Tung Hwa North Road, Taipei</p> <p>Joint Institutional Review Board, No 201, Sec. 2, Shih-Pai Road, Taipei City</p> <p>Human Experiment &amp; Ethics Committee, 8F, Building A, No. 100, Zihyou 1<sup>st</sup> Road Sanmin District, Kaohsiung City 807</p> <p>Human Experiment &amp; Ethics Committee, Kaohsiung Municipal Hsiao – Kang Hospital, 482, Shan-Ming Road, Hsiao-Kang Dist 812, Kaohsiung City</p> |



| Country | Institutional Review Board/Ethics Committee                                                                                                                                                                                                                                                                                                                                                                                                                                                                                                                                                                                                                                                                                                                                                                     |
|---------|-----------------------------------------------------------------------------------------------------------------------------------------------------------------------------------------------------------------------------------------------------------------------------------------------------------------------------------------------------------------------------------------------------------------------------------------------------------------------------------------------------------------------------------------------------------------------------------------------------------------------------------------------------------------------------------------------------------------------------------------------------------------------------------------------------------------|
| Turkey  | <p>Medical, Surgical and Drug Research Ethics Committee, Hacettepe University Faculty of Medicine, Deanship Building, Sıhhiye 06100, Ankara</p> <p>Research Ethics Committee of Medical Faculty, Ankara University, Morphology Building, Sıhhiye 06100, Ankara</p> <p>Drug Research Ethics Committee, Akdeniz University Faculty of Medicine, Dumlupınar Avenue, Kampus 07070, Antalya</p> <p>Ethics Committee of Istanbul University Cerrahpasa Faculty of Medicine, Deanship Building, Kocamustafapasa 34303, Istanbul</p> <p>Ethics Committee of Karadeniz Teknik University Faculty of Medicine, Merkez, Trabzon</p> <p>Ethics Committee of Gazi University Faculty of Medicine, Besevler 6500, Ankara</p>                                                                                                  |
| UK      | <p>Oxfordshire Regional Ethics Committee A, 2<sup>nd</sup> Floor, Astral House, Chaucer Business Park, Granville Way, Bicester</p> <p>Oxfordshire Regional Ethics Committee A, Room 13, Manor House, John Radcliffe Hospital, Headley Way, Oxford</p> <p>St. Thomas Hospital Research Ethics Committee, Ethics Committee Office, Block 5, South Wing, St. Thomas' Hospital, Lambeth Palace Road, London</p>                                                                                                                                                                                                                                                                                                                                                                                                     |
| USA     | <p>IRB for USC Health Science Campus, LAC + USC Medical Center &amp; Health Research Association, 2020 Zonal Avenue, Room 425, Los Angeles, CA</p> <p>Wright State University, Research &amp; Sponsored Programs, 201 J University Hall, 3640 Colonel Glenn Hwy, Dayton, OH</p> <p>Baystate Medical Center, Institutional Review Board, 759 Chestnut Street, Springfield, MA</p> <p>University of Maryland at Baltimore Institutional Review Board, 685 W. Baltimore St., Baltimore, MD</p> <p>VA Western New York Healthcare System, Institutional Review Board, 3495 Bailey Avenue, Buffalo, NY</p> <p>Tulane University Health Sciences Center, Committee on the Use of Human Subjects, Tidewater Bldg., Suite 1705, 1440 Canal Street, New Orleans, LA</p> <p>WIRB, 3535 Seventh Avenue SW, Olympia, WA</p> |

| Country | Institutional Review Board/Ethics Committee                                                                                                                                                                                                                                                                                                                                                                                                                                                                                                                                                                                                                                                                                                                                                                                                                                                                                                                                                                                                                                                                                                                                                                                                                                                                                                                                                                                                                                                                                                                                                                                                                                                                                                                                                                                                                                                                                                                                                                |
|---------|------------------------------------------------------------------------------------------------------------------------------------------------------------------------------------------------------------------------------------------------------------------------------------------------------------------------------------------------------------------------------------------------------------------------------------------------------------------------------------------------------------------------------------------------------------------------------------------------------------------------------------------------------------------------------------------------------------------------------------------------------------------------------------------------------------------------------------------------------------------------------------------------------------------------------------------------------------------------------------------------------------------------------------------------------------------------------------------------------------------------------------------------------------------------------------------------------------------------------------------------------------------------------------------------------------------------------------------------------------------------------------------------------------------------------------------------------------------------------------------------------------------------------------------------------------------------------------------------------------------------------------------------------------------------------------------------------------------------------------------------------------------------------------------------------------------------------------------------------------------------------------------------------------------------------------------------------------------------------------------------------------|
|         | <p>Ball Memorial Hospital IRB, 2401 W. University Avenue, Muncie, IN</p> <p>Covenant Health System, IRB, 1915 White Avenue, 7<sup>th</sup> Floor, Knoxville, TN</p> <p>St. Francis Medial Center, 601 Hamilton Avenue, Trenton, NJ</p> <p>Baptist Memorial Health Care Corp., Institutional Review Board, 6025 Walnut Grove Road, Suite 404, Memphis, TN</p> <p>North Memorial Health Care IRB, 3300 Oakdale Av N, MPLS, MN</p> <p>IRB (Subcommittee on Human Studies) of VA Long Beach Healthcare System, VA Long Beach Healthcare System, 09/151, 5901 E. Seventh Street, Long Beach, CA</p> <p>Lehigh Valley Hospital IRB, Health Studies Research, 17<sup>th</sup> &amp; Chew Streets, 6<sup>th</sup> Floor #38, Allentown, Pennsylvania</p> <p>Iowa Health – Des Moines, Institutional Review Board, 1415 Woodland Avenue, Suite 218, Des Moines, IA</p> <p>Ochsner Clinic Foundation, Institutional Review Board, 1514 Jefferson Highway, New Orleans, LA</p> <p>Health First Institutional Review Board, 1355 S. Hickory Street, Suite 202, Melbourne, FL</p> <p>Springfield Committee for Research Involving Human Subjects, P.O. Box 19616, Springfield, IL</p> <p>Aurora IRB, 945 N. 12<sup>th</sup> Street, P.O. Box 342 W310, Milwaukee, WI</p> <p>Pinnacle Health Institutional Review Board, Polyclinic Hospital, 709 Landis Building, 2501 North Third Street, Harrisburg, PA</p> <p>University of Illinois at Chicago, Institutional Review Board, Office for the Protection of Research Subjects, 203 Administrative Office Building, M/C 672, 1737 W. Polk Street, Chicago, IL</p> <p>Holy Spirit Hospital Institutional Review Board, 503 North 21<sup>st</sup> Street, Camp Hill, PA</p> <p>IRB of Memorial Hospital of South Bend, 615 North Michigan Street, South Bend, IN</p> <p>IRB of Saint Joseph’s Regional Medical Center, 801 East LaSalle Avenue, South Bend, IN</p> <p>Forsyth Medical Center, Institutional Review Board, 3333 Silas Creek Parkway, Winston-Salem, NC</p> |

| Country | Institutional Review Board/Ethics Committee                                                                                                                                                                                                                                                                                                                                                                                                                                                                                                                                                                                                                                                                                                                                                                                                                                                                                                                                                                                                                                                                                                                                                                                                                                                                                                                                                                                                                                                                                                                                                                                                                                                                                                                                                                                                                                                              |
|---------|----------------------------------------------------------------------------------------------------------------------------------------------------------------------------------------------------------------------------------------------------------------------------------------------------------------------------------------------------------------------------------------------------------------------------------------------------------------------------------------------------------------------------------------------------------------------------------------------------------------------------------------------------------------------------------------------------------------------------------------------------------------------------------------------------------------------------------------------------------------------------------------------------------------------------------------------------------------------------------------------------------------------------------------------------------------------------------------------------------------------------------------------------------------------------------------------------------------------------------------------------------------------------------------------------------------------------------------------------------------------------------------------------------------------------------------------------------------------------------------------------------------------------------------------------------------------------------------------------------------------------------------------------------------------------------------------------------------------------------------------------------------------------------------------------------------------------------------------------------------------------------------------------------|
|         | <p>ETSU/VA Institution Review Board, East Tennessee State University, Box 70565, Johnson City, TN</p> <p>Sharp Health Care, Office for the Protection of Research Participants, 8695 Spectrum Center Boulevard, San Diego, CA</p> <p>Winchester Medical Institutional Review Board, 1840 Amherst Street, Winchester, VA</p> <p>Sutter Health Central Area, Institutional Review Committee, 2801 Capitol Avenue, Ste. 400, Sacramento, CA</p> <p>Sentara Virginia Beach General Hospital, Institutional Review Board, 1060 First Colonial Road, Virginia Beach, VA</p> <p>Human Studies Committee, Washington University School of Medicine, 660 S. Euclid Avenue, Box 8052, St. Louis, MO</p> <p>Medstar Research Institute, Institutional Review Board, 6495 New Hampshire Ave., Ste. 201, Hyattsville, MD</p> <p>Covenant Health Systems, Institutional Review Board, 1915 White Avenue, Knoxville, TN</p> <p>University of Texas, Committee for the Protection of Human Subjects, Office of Research Support Committees, University Center Tower, 7000 Fannin, Suite 750, Houston, TX</p> <p>St. Bernards Medical Center, Institutional Review Board, 225 E. Jackson, Jonesboro, AR</p> <p>Health Sciences Institutional Review Board, 125 Folk Hall, One Hospital Drive, Columbia, MO</p> <p>Baptist Health System Institutional Review Board, 137 Blount Avenue, Knoxville, TN</p> <p>Mercy Hospital Institutional Review Board, 3663 South Miami Avenue, Miami, FL</p> <p>Baptist Health System, Institutional Review Board, 730 Main, Suite 324, San Antonio, TX</p> <p>Baptist Health System Institutional Review Board, 137 Blount Avenue, Knoxville, TN</p> <p>Patient Advocacy Council, Institutional Review Board, 601 Bel Air Boulevard, Suite 315, Mobile, AL</p> <p>Institutional Review Board, Good Samaritan Hospital, c/o Medical Staff Office, 2425 Samaritan Drive, San Jose, CA</p> |

| <b>Country</b> | <b>Institutional Review Board/Ethics Committee</b>                                    |
|----------------|---------------------------------------------------------------------------------------|
|                | Eastern Maine Medical Center, Human Rights Committee, 489 State Street, Bangor, Maine |
